# Supplementary material for: Peptide nanosponges designed for rapid uptake by leukocytes and neural stem cells
Source: Royal Society of Chemistry journal article supplement (doi:10.1039/c8ra00717a), 2018-01-01
Supplement: c8ra00717a1.pdf [file c8ra00717a1.pdf]

## Peptide Nanosponges Designed for Rapid Uptake by Leukocytes and Neural Stem Cells

Asanka S. Yapa<sup>a‡</sup>, Hongwang Wang<sup>a‡</sup>, Sebastian O. Wendel<sup>bc‡</sup>, Tej. B. Shrestha<sup>b‡</sup>, Nilusha L. Kariyawasam<sup>a</sup>, Madumali Kalubowilage<sup>a</sup>, Ayomi S. Perera<sup>a†</sup>, Marla Pyle<sup>b</sup>, Matthew T. Basel<sup>b</sup>, Aruni P. Malalasekera<sup>a†</sup>, Harshi Manawadu<sup>a†</sup>, Jing Yu<sup>a</sup>, Yubisela Toledo<sup>a</sup>, Raquel Ortega<sup>a</sup>, Prem S. Thapa<sup>c</sup>, Paul E. Smith<sup>a</sup>, Deryl L. Troyer<sup>b\*</sup>, Stefan H. Bossmann<sup>a\*</sup>

<sup>a</sup> Department of Chemistry, Kansas State University, Manhattan, KS, USA

<sup>b</sup> Department of Anatomy & Physiology, Kansas State University, Manhattan, KS, USA

<sup>c</sup> Microscopy and Analytical Imaging Laboratory, University of Kansas, Lawrence, KS, USA

‡These authors have contributed equally

†Present addresses are provided in the main manuscript

<sup>a</sup> Department of Chemistry, Kansas State University, Manhattan, KS, USA

<sup>b</sup> Department of Anatomy & Physiology, Kansas State University, Manhattan, KS, USA

<sup>c</sup> Microscopy and Analytical Imaging Laboratory, University of Kansas, Lawrence, KS, USA

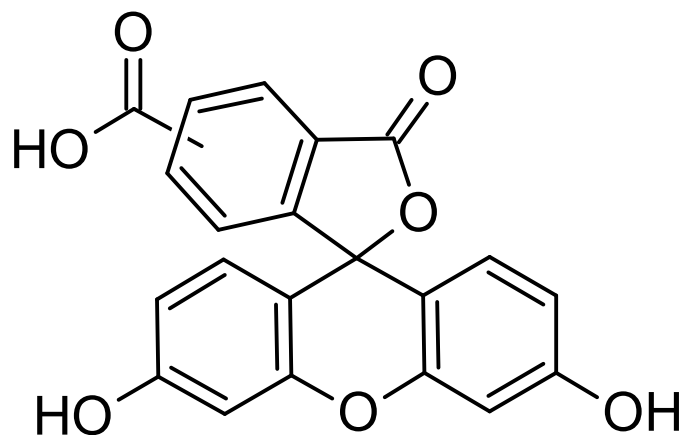

Figure S.1 5(6)-Carboxyfluorescein

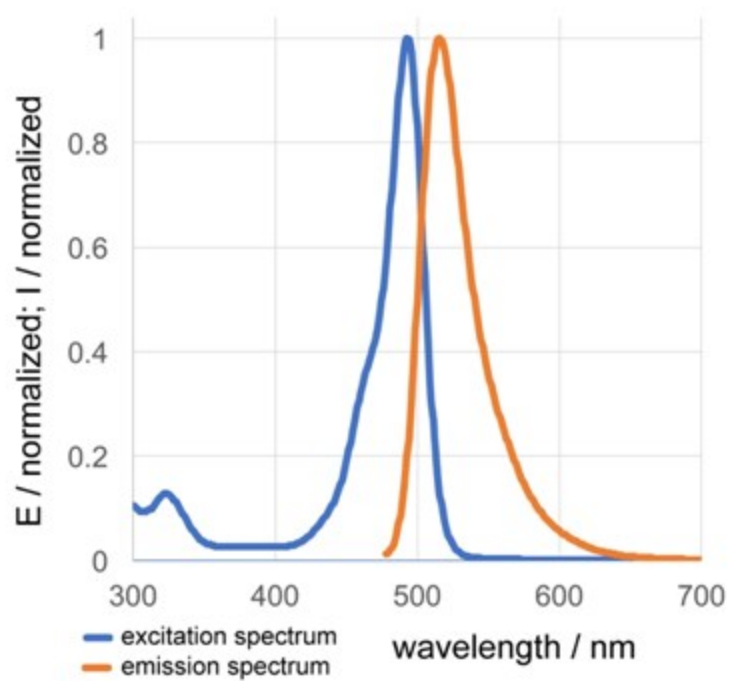

Figure S.2 Excitation and emission spectrum of 5(6)-carboxyfluorescein in PBS (pH = 7.4).

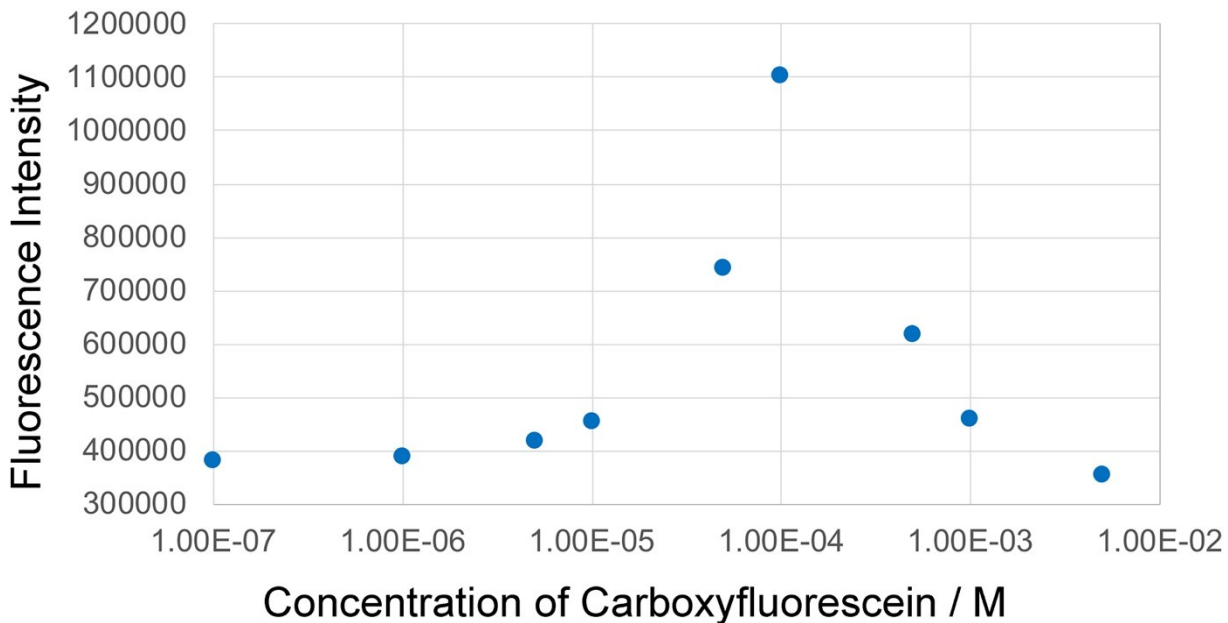

Figure S.3 Concentration dependence of the emission of 5(6)-carboxyfluorescein fluorescence in PBS (pH = 7.4), measuring using a Fluoromax-2 spectrometer, optical path length = 1.0 cm.  $\lambda_{EX} = 482 \pm 1$  nm,  $\lambda_{EM} = 515 \pm 5$  nm. In the concentration interval of  $1.0 \times 10^{-7}$  M and  $5 \times 10^{-5}$  M, the emission intensity of 5(6)-carboxyfluorescein is proportional to its concentration. Beyond this threshold, self-quenching of 5(6)-carboxyfluorescein is observed.

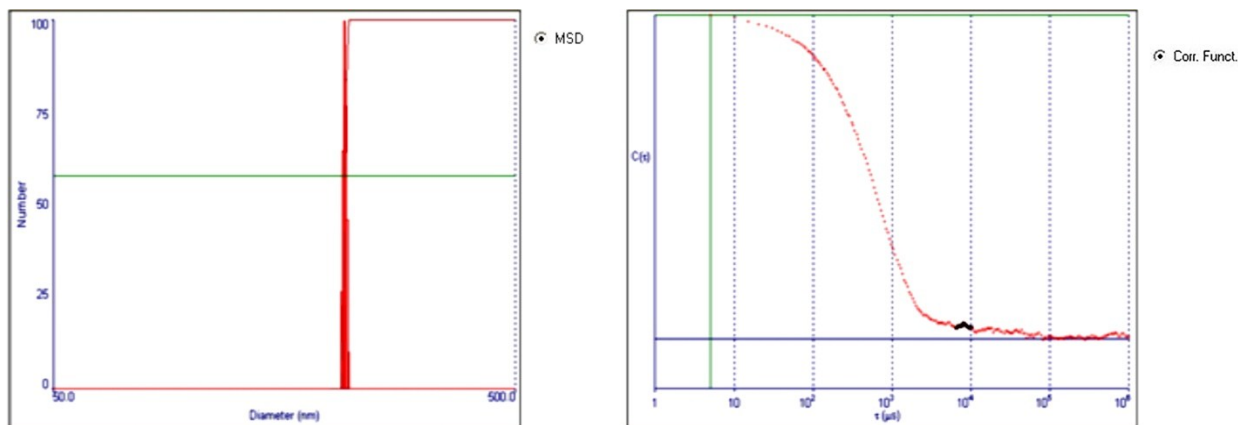

Figure S.4 DLS of 5(6)-Carboxyfluorescein-loaded type DK 20 nanosponges in PBS (phosphate-buffered saline, pH=7.4). The average diameter of the peptide nanosponges formed is  $213 \pm 25$  nm. The nanosponges remained stable during 24h.

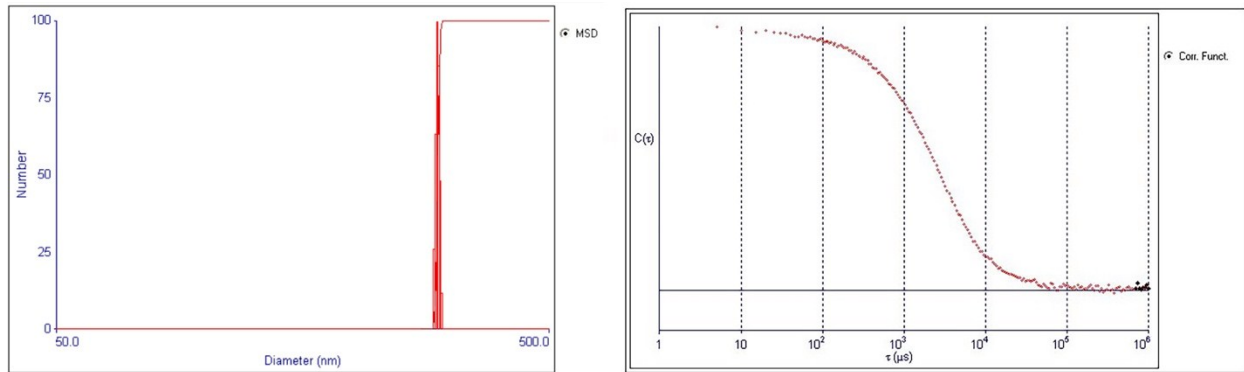

Figure S.5 DLS of 5(6)-Carboxyfluorescein-loaded type DK 20 nanosponges in PBS containing 5 percent of human serum from healthy volunteers, obtained from the Biorepository of the University of Kansas Cancer Center. The average diameter of the peptide nanosponges formed is  $618 \pm 25$  nm. The nanosponges remained stable during 24h, indicating virtually no proteolytic cleavage.

### Estimation of the Average Number of Carboxyfluorescein molecules per DK20 Nanosponge

In our earlier research, we have reported the molecular weight of type K20 nanosponges ( $11334.74 \text{ g mol}^{-1}$ ) and type D20 nanosponges ( $10439.51 \text{ g mol}^{-1}$ ). The concentration of DK20 nanosponges (1:1 mixture) in the described encapsulation experiments was  $0.0005\text{M}$  for each component. The concentration of carboxyfluorescein was  $10 \text{ micromolar}$  ( $65 \text{ percent}$  loading efficiency). The average size of the carboxyfluorescein-loaded nanosponge was  $45 \pm 10 \text{ nm}$  (see Figure 6), corresponding to an average volume of each nanosponge of  $4.77 \times 10^{-23} \text{ m}^3$ . Assuming that approx.  $50\%$  of the mass of the nanosponges is contributed by water and the approx. density of the nanosponges is close to  $1.0 \text{ g cm}^{-3}$ , we estimate the number of nanosponges per liter to  $4.6 \times 10^{17}$  at the reported concentration. The microheterogeneous system contains  $3.91 \times 10^{18} \text{ molecules L}^{-1}$  of carboxyfluorescein. Based on these assumptions, the average number of carboxyfluorescein molecules per DK20 nanosponge is  $8.5$ , or rather, between  $8$  and  $9$ .
